2. Rekola S, Bergstrand A, Bucht H. Deterioration of GFR in IgA nephropathy as measured by <sup>51</sup>Cr-EDTA clearance. *Kidney Int* 1991; 40: 1050–1054
3. Koyama A, Igarashi M, Kobayashi M. Natural history and risk factors for immunoglobulin A nephropathy in Japan. Research Group on Progressive Renal Diseases. *Am J Kidney Dis* 1997; 29: 526–532
4. Geddes CC, Rauta V, Gronhagen-Riska C *et al.* A tricontinental view of IgA nephropathy. *Nephrol Dial Transplant* 2003; 18: 1541–1548
5. Hsu SI, Ramirez SB, Winn MP *et al.* Evidence for genetic factors in the development and progression of IgA nephropathy. *Kidney Int* 2000; 57: 1818–1835
6. Schena FP, Scivittaro V, Ranieri E *et al.* Abnormalities of the IgA immune system in members of unrelated pedigrees from patients with IgA nephropathy. *Clin Exp Immunol* 1993; 92: 139–144
7. Bisceglia L, Cerullo G, Forabosco P *et al.* Genetic heterogeneity in Italian families with IgA nephropathy: suggestive linkage for two novel IgA nephropathy loci. *Am J Hum Genet* 2006; 79: 1130–1134
8. Gharavi AG, Yan Y, Scolari F *et al.* IgA nephropathy, the most common cause of glomerulonephritis, is linked to 6q22–23. *Nat Genet* 2000; 26: 354–357
9. O'Connell PJ, Ibels LS, Thomas MA *et al.* Familial IgA nephropathy: a study of renal disease in an Australian aboriginal family. *Aust N Z J Med* 1987; 17: 27–33
10. Julian BA, Quiggins PA, Thompson JS *et al.* Familial IgA nephropathy. Evidence of an inherited mechanism of disease. *N Engl J Med* 1985; 312: 202–208
11. Paterson AD, Liu XQ, Wang K *et al.* Genome-wide linkage scan of a large family with IgA nephropathy localizes a novel susceptibility locus to chromosome 2q36. *J Am Soc Nephrol* 2007; 18: 2408–2415
12. The Wellcome Trust Case Control Consortium. Genome-wide association study of 14, 000 cases of seven common diseases and 3,000 shared controls. *Nature* 2007; 447: 661–678
13. Ohtsubo S, Iida A, Nitta K *et al.* Association of a single-nucleotide polymorphism in the immunoglobulin mu-binding protein 2 gene with immunoglobulin A nephropathy. *J Hum Genet* 2005; 50: 30–35
14. Li YJ, Du Y, Li CX *et al.* Family-based association study showing that immunoglobulin A nephropathy is associated with the polymorphisms 2093C and 2180T in the 3' untranslated region of the Megsin gene. *J Am Soc Nephrol* 2004; 15: 1739–1743
15. Sasieni PD. From genotypes to genes: doubling the sample size. *Biometrics* 1997; 53: 1253–1261
16. Spielman RS, McGinnis RE, Ewens WJ. Transmission test for linkage disequilibrium: the insulin gene region and insulin-dependent diabetes mellitus (IDDM). *Am J Hum Genet* 1993; 52: 506–516
17. Horvath S, Xu X, Lake SL *et al.* Family-based tests for associating haplotypes with general phenotype data: application to asthma genetics. *Genet Epidemiol* 2004; 26: 61–69
18. Pritchard JK, Stephens M, Donnelly P. Inference of population structure using multilocus genotype data. *Genetics* 2000; 155: 945–959
19. Barrett JC, Fry B, Maller J *et al.* Haploview: analysis and visualization of LD and haplotype maps. *Bioinformatics* 2005; 21: 263–265
20. Pritchard JK, Stephens M, Rosenberg NA *et al.* Association mapping in structured populations. *Am J Hum Genet* 2000; 67: 170–181
21. Skol AD, Scott LJ, Abecasis GR *et al.* Joint analysis is more efficient than replication-based analysis for two-stage genome-wide association studies. *Nat Genet* 2006; 38: 209–213
22. Purcell S, Cherny SS, Sham PC. Genetic Power Calculator: design of linkage and association genetic mapping studies of complex traits. *Bioinformatics* 2003; 19: 149–150
23. Fukita Y, Mizuta TR, Shirozu M *et al.* The human S mu bp-2, a DNA-binding protein specific to the single-stranded guanine-rich sequence related to the immunoglobulin mu chain switch region. *J Biol Chem* 1993; 268: 17463–17470
24. Grohmann K, Schuelke M, Diers A *et al.* Mutations in the gene encoding immunoglobulin mu-binding protein 2 cause spinal muscular atrophy with respiratory distress type 1. *Nat Genet* 2001; 29: 75–77
25. Cox GA, Mahaffey CL, Frankel WN. Identification of the mouse neuromuscular degeneration gene and mapping of a second site suppressor allele. *Neuron* 1998; 21: 1327–1337

Received for publication: 9.4.09; Accepted in revised form: 13.11.09

*Nephrol Dial Transplant* (2010) 25: 1554–1559

doi: 10.1093/ndt/gfp694

Advance Access publication 27 December 2009

## Cerebral microbleeds in predialysis patients with chronic kidney disease

Hideaki Shima<sup>1</sup>, Eiji Ishimura<sup>2</sup>, Toshihide Naganuma<sup>3</sup>, Takeshi Yamazaki<sup>3</sup>, Ikue Kobayashi<sup>1</sup>, Kaori Shidara<sup>1</sup>, Katsuhito Mori<sup>1</sup>, Yoshiaki Takemoto<sup>3</sup>, Tetsuo Shoji<sup>1</sup>, Masaaki Inaba<sup>1</sup>, Mikio Okamura<sup>4</sup>, Tatsuya Nakatani<sup>3</sup> and Yoshiki Nishizawa<sup>1</sup>

<sup>1</sup>Department of Endocrinology, Metabolism and Molecular Medicine, Osaka City University Graduate School of Medicine, Osaka, Japan, <sup>2</sup>Department of Nephrology, Osaka City University Graduate School of Medicine, Osaka, Japan, <sup>3</sup>Department of Urology, Osaka City University Graduate School of Medicine, Osaka, Japan and <sup>4</sup>Ohno Memorial Hospital, Osaka, Japan

Correspondence and offprint requests to: Eiji Ishimura; E-mail: ish@med.osaka-cu.ac.jp

### Abstract

**Background.** Gradient-echo T2\*-weighted magnetic resonance imaging (T2\*-weighted MRI) is highly sensitive for

detecting cerebral microbleeds (CMBs). CMBs have been reported to be a risk factor for future cerebrovascular events and a marker of cerebral small vessel disease in the general

population. Chronic kidney disease (CKD) is an independent risk factor for cardiovascular disease. The relationship between CKD and CMBs, which has not been clarified to date, is examined.

**Methods.** In this cross-sectional study, T2\*-weighted MRI of brain was performed with a 1.5-T MRI system in 162 CKD patients (CKD stages 1–5, excluding CKD stage 5 (D)) and 24 normal subjects.

**Results.** CMBs were found in 35 CKD patients (25.6%), but not in control subjects. CMBs were more prevalent in male patients, in those with higher blood pressure, advanced age and poor kidney function. There was a significant association between the prevalence of CMBs and the CKD stage, with higher prevalence of CMBs as the CKD stages advanced ( $P < 0.01$ ). Estimated glomerular filtration rate was a significant factor associated with the prevalence of CMBs, independent of age, gender and hypertension. There was no significant relationship between CMBs and the presence of diabetes mellitus and dyslipidemia.

**Conclusions.** Decreased renal function is a significant risk factor for CMBs, independent of the presence of hypertension. Poor kidney function could be associated with future cerebrovascular events.

**Keywords:** arteriosclerosis; chronic kidney disease; microbleeds; T2\*-weighted magnetic resonance imaging

## Introduction

Chronic kidney disease (CKD) has been shown to be an independent risk factor for cardiovascular disease [1–4]. CKD patients generally have more risk factors, such as increased arteriosclerosis and hypertension, which are associated with cardiovascular events, compared with normal subjects [1–7]. Several reports have indicated that CKD is associated with a high prevalence of stroke [8–11].

Recently, cerebral microbleeds (CMBs) have become detectable to a high degree of sensitivity with Gradient-echo T2\*-weighted magnetic resonance imaging (T2\*-weighted MRI), while they can barely be visualized with other conventional scans [12,13]. T2\*-weighted MRI sensitively detects small areas of signal loss, which represent remnants of previous CMBs [12,13] (Figure 1). This T2\* effect occurs through local magnetic field inhomogeneities caused by haemosiderin deposits [12–14]. It has been confirmed pathologically that the CMBs on T2\*-MRI represent minor blood leakage through damaged blood vessels, in addition to minor hemorrhage [12–14]. The presence of CMBs has been reported to be associated with cerebrovascular events [13–17]. It has been reported to suggest that the microangiopathy has reached an advanced stage, in which the blood vessels are prone to bleeding [13–17]. Kato *et al.* reported that 71.4% of patients with symptomatic cerebral hemorrhage had CMBs. Thus, CMBs have been reported to indicate a higher risk of future intracerebral haemorrhage and to be a marker of cerebral small vessel disease in the general population [12–14,16–19].

The prevalence of CMBs in healthy populations without cerebrovascular disease ranges from 3.1 to 6.4%

[16,17,19]. In haemodialysis patients, there is a significantly higher prevalence of CMBs compared with normal subjects [20,21]. However, there have been no reports on the prevalence of CMBs in CKD patients without dialysis therapy. In the present study, we investigated the prevalence of CMBs in CKD patients without dialysis therapy and examined the relationship between the prevalence of CMBs and clinical factors.

## Materials and methods

### Patients

All patients in this study were admitted to the Department of Nephrology or Urology of Osaka City University Hospital, for treatment and education for CKD from January 2008 to April 2009. A total of 162 consecutive CKD patients without dialysis therapy and without neurological abnormalities were enrolled in this study. They had no past history or symptoms of stroke based on their medical records. There were 85 patients with diabetes and 77 without. In this study, all patients had haematuria, proteinuria and/or albuminuria, as determined by dip-stick examination or turbid immunoassay of the urine, at least >3 months. In all patients, serum creatinine was measured at least three times during admission, and it was confirmed that the levels of serum creatinine were not substantially changed during admission. Serum creatinine concentrations at the time of MRI were entered for the statistical analysis. CKD was defined as patients with kidney damage, as reported by KDIGO [22]. None of the healthy subjects we examined as controls exhibited proteinuria or had any history of past kidney diseases. Patients with vasculitis, rapidly progressive glomerulonephritis, polycystic kidney disease and malignancy were excluded from the present study. As a control, 24 healthy subjects who visited Ohno Memorial Hospital for screening checkup of the brain were also examined. Written informed consent was obtained from each of the patients and healthy subjects. This study protocol was approved by the ethical committee of Osaka City University Hospital (no. 1415).

Blood pressure was measured with the patients resting in a supine position for at least 10 min on the day of MRI, using a standard mercury sphygmomanometer and cuffs adapted to their arm circumference. The systolic blood pressure was taken as the point of appearance of Korotkoff sounds, and the diastolic blood pressure was the point at which the sounds disappeared. In this study, hypertension was defined by (i) administration of antihypertensive agents or a history of hypertension, (ii) systolic pressure  $\geq 140$  mm Hg or (iii) diastolic pressure  $\geq 90$  mm Hg. Diabetes mellitus was defined by (i) administration of insulin or oral antidiabetic agents or (ii) prior diagnosis according to the Report of the Expert Committee on the Diagnosis and Classification of Diabetes Mellitus of the American Diabetes Association (1998) [23].

Blood samples were obtained from patients after overnight fasting. Total protein, serum albumin, total cholesterol, triglyceride, LDL cholesterol, HDL cholesterol, blood urea nitrogen (BUN), C-reactive protein and haemoglobin (Hb) were measured by routine laboratory methods. Hb A1C was measured using high performance liquid chromatography. Estimated glomerular filtration rate (eGFR) was calculated using the following formula:

$$\text{eGFR}[\text{ml}/\text{min}/1.73 \text{ m}^2] = 194 \times (\text{serum creatinine})^{-1.084} \times (\text{age})^{-0.287}$$

The value was multiplied by 0.739 for women. This formula represents the eGFR for Japanese reported by Japanese Society of Nephrology [24]. We stratified eGFR into the following ranges:  $\geq 90$  ml/min/1.73 m<sup>2</sup> (stage 1), 60–89 ml/min/1.73 m<sup>2</sup> (stage 2), 30–59 ml/min/1.73 m<sup>2</sup> (stage 3), 15–29 ml/min/1.73 m<sup>2</sup> (stage 4) and  $<15$  ml/min/1.73 m<sup>2</sup> (stage 5), according to the National Kidney Foundation-Kidney Disease Outcomes Quality Initiative classification and staging system [22].

### Magnetic resonance imaging

All participating patients underwent a brain MRI that used a superconducting magnet at a field strength of 1.5 T on proton density, T1-weighted, T2-weighted, FLAIR images and two-dimensional T2\*-weighted MRI in axial planes at 5 mm thick slices with an interslice gap of 1.5 mm. The MR

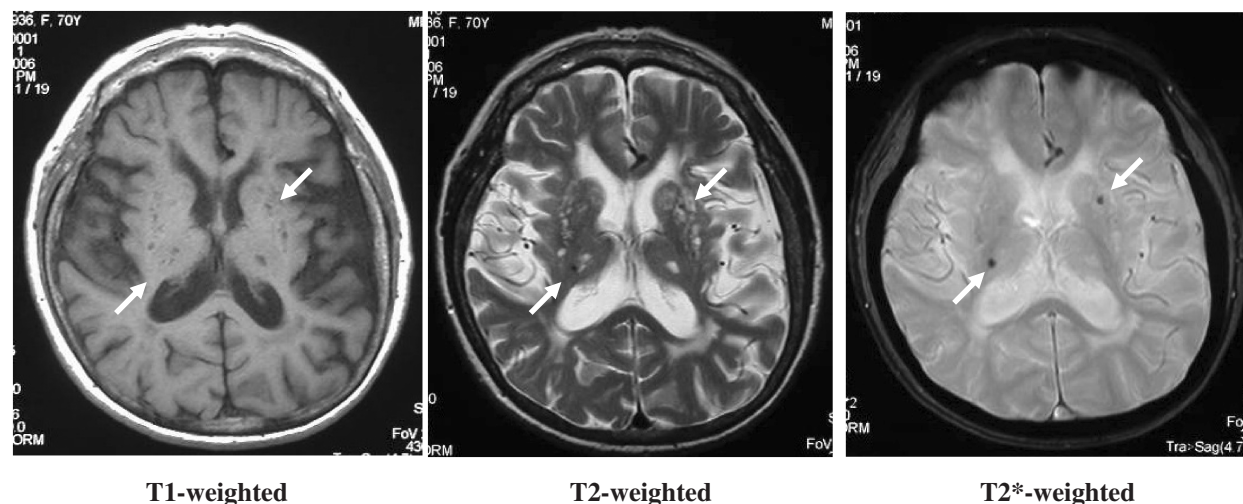

**Fig. 1.** Cerebral microbleeds (CMBs) examined by MRI, including T1, T2 and T2\*-weighted MRI images in which T2\*-weighted MRI clearly demonstrates the presence of CMBs (arrows), although T1 or T2 MRI can barely demonstrate its presence (70-year-old woman with CMBs).

images were assessed independently by two neuro-radiologists who had not been notified of the clinical information.

statistically significant. These results were determined on a Windows computer using the Stat View V Statistical System (SAS Institute, Cary, NC).

#### Statistical analysis

All data are expressed as the mean  $\pm$  SD. Differences between groups were examined by unpaired Student's *t*-test. Categorical variables were compared, using  $\chi^2$  test. Multiple logistic regression analyses were used to assess the combined influence of variables on the presence of CMBs. Gender, diabetes mellitus, current smoking and presence of hypertensive were represented by dummy variables (0 = male, 1 = female; 0 = absence, 1 = presence) in logistic regression analyses. A *P* value  $<0.05$  was considered

#### Results

##### Prevalence of CMBs in CKD patients

Of the 162 CKD patients, CMBs were found in 35 (21.6%). In Table 1, the clinical characteristics are shown, according to the presence or absence of CMBs, in addition to those of

**Table 1.** Clinical characteristics of patients with and without CMBs and healthy subjects

|                                                   | Patients          |                  | <i>P</i> <sup>a</sup> | Healthy subjects |
|---------------------------------------------------|-------------------|------------------|-----------------------|------------------|
|                                                   | Without CMBs      | With CMBs        |                       |                  |
| Number (male/female)                              | 66/61             | 26/9             | 0.1830                | 14/10            |
| Age (years)                                       | 62.0 $\pm$ 14.3   | 75.2 $\pm$ 25.7  | 0.0019                | 59.7 $\pm$ 5.8   |
| BMI (kg/m <sup>2</sup> )                          | 22.8 $\pm$ 4.0    | 22.7 $\pm$ 3.5   | 0.8436                | 22.9 $\pm$ 2.9   |
| History of smoking (presence/absence)             | 44/83             | 12/23            | 0.9684                | 7/17             |
| Systolic pressure (mm Hg)                         | 127.0 $\pm$ 12.0  | 153.9 $\pm$ 28.6 | $<0.0001$             | 122.9 $\pm$ 15.0 |
| Diastolic pressure (mm Hg)                        | 69.1 $\pm$ 12.0   | 75.2 $\pm$ 9.5   | 0.0058                | 79.8 $\pm$ 9.4   |
| Pulse pressure (mm Hg)                            | 58.0 $\pm$ 17.2   | 78.7 $\pm$ 25.7  | $<0.0001$             | 43.1 $\pm$ 10.3  |
| History of hypertension (presence/absence)        | 75/52             | 31/4             | 0.0012                | 6/18             |
| History of diabetes (presence/absence)            | 62/65             | 23/12            | 0.0764                | 0/24             |
| Anticoagulation or anti-platelet therapy (yes/no) | 44/83             | 18/17            | 0.1322                | 0/24             |
| BUN (mg/dl)                                       | 36.0 $\pm$ 24.8   | 63.9 $\pm$ 36.4  | $<0.0001$             | 13.7 $\pm$ 3.0   |
| Creatinine (mg/dl)                                | 2.91 $\pm$ 2.53   | 5.03 $\pm$ 2.88  | $<0.0001$             | 0.60 $\pm$ 0.14  |
| eGFR (ml/min)                                     | 35.7 $\pm$ 33.7   | 15.0 $\pm$ 12.9  | 0.0005                | 97.5 $\pm$ 19.8  |
| Total protein (g/dl)                              | 6.17 $\pm$ 1.09   | 6.15 $\pm$ 0.80  | 0.9274                | 7.10 $\pm$ 0.31  |
| Albumin (g/dl)                                    | 3.26 $\pm$ 0.75   | 3.25 $\pm$ 0.67  | 0.8973                | 4.21 $\pm$ 0.23  |
| Total cholesterol (mg/dl)                         | 213.1 $\pm$ 80.1  | 182.9 $\pm$ 52.2 | 0.0388                | 208.8 $\pm$ 32.1 |
| Triglyceride (mg/dl)                              | 163.1 $\pm$ 120.9 | 137.6 $\pm$ 77.5 | 0.2538                | 98.9 $\pm$ 48.2  |
| LDL cholesterol (mg/dl)                           | 124.8 $\pm$ 50.3  | 103.4 $\pm$ 33.4 | 0.0317                | 120.0 $\pm$ 29.2 |
| HDL cholesterol (mg/dl)                           | 48.6 $\pm$ 16.4   | 42.5 $\pm$ 9.9   | 0.0600                | 68.3 $\pm$ 18.3  |
| Hb (g/dl)                                         | 11.5 $\pm$ 2.3    | 10.6 $\pm$ 1.9   | 0.0398                | 13.9 $\pm$ 1.4   |
| C-reactive protein (mg/dl)                        | 0.59 $\pm$ 1.68   | 0.45 $\pm$ 0.67  | 0.6407                | 0.14 $\pm$ 0.11  |
| Fasting blood glucose (mg/dl)                     | 116.0 $\pm$ 66.4  | 107.2 $\pm$ 36.0 | 0.4867                | 100.5 $\pm$ 9.7  |
| Haemoglobin A1C (%)                               | 6.56 $\pm$ 1.61   | 6.45 $\pm$ 1.27  | 0.7108                | 5.23 $\pm$ 0.38  |

Data are number or means  $\pm$  SD. BMI, body mass index; BUN, blood urea nitrogen; eGFR, estimated glomerular filtration rate; LDL, low density lipoprotein; HDL, high density lipoprotein.

<sup>a</sup>Patients with vs without CMBs.

**Table 2.** Number of patients with CMBs according to CKD stages

| CKD stage    | Stage 1 or 2 | Stage 3 | Stage 4 | Stage 5 | Total number | Healthy subjects |
|--------------|--------------|---------|---------|---------|--------------|------------------|
| Without CMBs | 31           | 24      | 32      | 40      | 127          | 24               |
| With CMBs    | 1            | 4       | 9       | 21      | 35           | 0                |
| Total number | 32           | 28      | 41      | 61      | 162          | 24               |

$P = 0.0041$  ( $\chi^2$  test).

**Table 3.** Odds ratios of potentially predictive variables for the presence of CMBs in CKD patients

|                                           | Unadjusted |              |          | Adjusted <sup>a</sup> |              |          |
|-------------------------------------------|------------|--------------|----------|-----------------------|--------------|----------|
|                                           | Odds ratio | 95% CI       | <i>P</i> | Odds ratio            | 95% CI       | <i>P</i> |
| Age (year)                                | 1.058      | 1.019–1.098  | 0.028    | –                     | –            | –        |
| Gender (female vs male)                   | 0.375      | 0.163–0.863  | 0.0210   | –                     | –            | –        |
| BMI (kg/m <sup>2</sup> )                  | 0.990      | 0.899–1.090  | 0.8424   | 1.019                 | 0.913–1.138  | 0.7351   |
| History of smoking (presence vs absence)  | 0.984      | 0.448–2.164  | 0.9684   | 0.769                 | 0.317–1.864  | 0.5611   |
| Systolic pressure (mm Hg)                 | 1.044      | 1.026–1.062  | <0.0001  | 1.040                 | 1.022–1.059  | <0.0001  |
| Diastolic pressure (mm Hg)                | 1.046      | 1.012–1.080  | 0.0074   | 1.067                 | 1.028–1.107  | 0.0006   |
| Pulse pressure (mm Hg)                    | 1.046      | 1.026–1.067  | <0.0001  | 1.040                 | 1.018–1.062  | 0.0002   |
| Hypertension (presence vs absence)        | 5.373      | 1.789–16.140 | 0.0027   | 4.209                 | 1.353–12.095 | 0.0131   |
| Creatinine (mg/dl)                        | 1.297      | 1.135–1.481  | 0.0001   | 1.291                 | 1.117–1.492  | 0.0005   |
| eGFR (ml/min)                             | 0.953      | 0.926–0.981  | 0.0011   | 0.953                 | 0.924–0.983  | 0.0005   |
| Total cholesterol (mg/dl)                 | 0.992      | 0.985–1.000  | 0.0392   | 0.994                 | 0.986–1.002  | 0.1389   |
| Triglyceride (mg/dl)                      | 0.997      | 0.992–1.001  | 0.2488   | 1.000                 | 0.995–1.004  | 0.8940   |
| LDL cholesterol (mg/dl)                   | 0.989      | 0.978–0.999  | 0.0567   | 0.989                 | 0.978–1.000  | 0.0516   |
| HDL cholesterol (mg/dl)                   | 0.967      | 0.934–0.993  | 0.0351   | 0.972                 | 0.937–1.008  | 0.1312   |
| Hb (g/dl)                                 | 0.817      | 0.672–1.291  | 0.0427   | 0.826                 | 0.663–1.028  | 0.0861   |
| C-reactive protein (mg/dl)                | 0.925      | 0.662–1.237  | 0.6452   | 0.877                 | 0.589–1.306  | 0.5178   |
| Hb A1C (%)                                | 0.951      | 0.732–1.237  | 0.7088   | 0.927                 | 0.695–1.237  | 0.6063   |
| History of diabetes (presence vs absence) | 2.009      | 0.921–4.383  | 0.0795   | 1.789                 | 0.783–4.085  | 0.1675   |

CI, confidence interval.

<sup>a</sup>Adjusted by age and gender.

the healthy subjects. The patients with CMBs were significantly older than in those without. Both systolic and diastolic pressures and prevalence of hypertension were significantly higher in patients with CMBs than in those without. Pulse pressure was significantly greater in the former than in the latter group. The prevalence of CMBs was significantly higher in patients with a history of hypertension than in those without. BUN and serum creatinine were significantly higher in patients with CMBs than in those without. eGFR was significantly lower in patients with CMBs than in those without. LDL cholesterol and Hb levels were significantly lower in the former than in the latter group. However, there were no significant differences in the prevalence of diabetes mellitus between the patients with and without CMBs. There were no significant differences in the prevalence of CMBs between patients with and without anticoagulation and/or anti-platelet therapy. There were no significant differences in the other clinical parameters.

#### Prevalence of CMBs according to CKD stage

Table 2 shows the prevalence of CMBs in CKD patients according to the CKD stages and in healthy subjects. There were no CMBs in healthy subjects or in patients that were CKD stage 1. One patient with CKD stage 2 had CMBs. The prevalence of CMBs increased as the CKD stage advanced. In the patients with CKD stage 3 ( $n = 28$ ), four (14.3%) had CMBs. In the patients with CKD stage 4 ( $n = 41$ ), nine

(22.0%) had CMBs. In the patients that were CKD stage 5, 21 patients (34.4%) out of 61 exhibited CMBs.  $\chi^2$  test revealed significantly higher prevalence of CMBs as the stages of CKD advanced ( $P = 0.0041$ ).

#### Factors associated with CMBs in CKD patients

A univariate logistic regression analysis was performed to examine the factors associated with the presence of CMBs (Table 3). Significant factors were age, male gender, presence of hypertension, systolic pressure, diastolic pressure, pulse pressure, creatinine, eGFR, total cholesterol, HDL cholesterol and Hb. However, in a logistic regression analysis after adjustment for age and gender, which were unmodifiable, basic clinical factors of the patients, presence of hypertension, systolic pressure, diastolic pressure, pulse pressure, creatinine and eGFR remained significant. These significant factors are related to blood pressure and renal function.

#### Independent association of blood pressure and renal function with CMBs

Next, we performed multivariate logistic analyses to examine the independent association of eGFR and blood pressure with the presence of CMBs (Table 4). In models 1, 2 and 3 of logistic regression analyses, systolic pressure, diastolic pressure and pulse pressure were significantly associated



**Table 4.** Odds ratio for the presence of CMBs adjusted by variables

|                            | Model 1    |             |        | Model 2    |             |        | Model 3    |             |        |
|----------------------------|------------|-------------|--------|------------|-------------|--------|------------|-------------|--------|
|                            | Odds ratio | 95% CI      | P      | Odds ratio | 95% CI      | P      | Odds ratio | 95% CI      | P      |
| Age (year)                 | 1.050      | 1.001–1.102 | 0.0466 | 1.076      | 1.022–1.132 | 0.0051 | 1.036      | 0.989–1.085 | 0.1331 |
| Gender (female vs male)    | 0.347      | 0.131–0.919 | 0.0311 | 0.328      | 0.127–0.845 | 0.0209 | 0.337      | 0.131–0.864 | 0.0236 |
| eGFR (ml/min)              | 0.971      | 0.942–1.000 | 0.0528 | 0.956      | 0.926–0.988 | 0.0067 | 0.967      | 0.939–0.996 | 0.0274 |
| Systolic pressure (mm Hg)  | 1.034      | 1.034–1.014 | 0.0006 | –          | –           | –      | –          | –           | –      |
| Diastolic pressure (mm Hg) | –          | –           | –      | 1.058      | 1.019–1.099 | 0.0035 | –          | –           | –      |
| Pulse pressure (mm Hg)     | –          | –           | –      | –          | –           | –      | 1.030      | 1.008–1.053 | 0.0072 |

with the presence of CMBs, independent of age, gender and eGFR, respectively. Furthermore, eGFR was a significant factor associated with the presence of CMBs, independent of diastolic pressure and pulse pressure. eGFR was also a factor associated with the presence of CMBs, independent of systolic pressure in a border line significance ( $P = 0.0528$ ).

## Discussion

In the present study, using T2\*-weighted MRI, we examined the prevalence of CMBs in CKD patients. We found that the prevalence of CMBs was significantly higher as the CKD stage was advanced. Logistic regression analyses revealed that significant factors associated with CMBs were older age, male gender, higher blood pressure, higher pulse pressure and lower eGFR. Furthermore, these factors were significantly and independently associated with the presence of CMBs.

In the general population, CMBs have been reported to be related to older age, hypertension, smoking, leukoaraiosis, paraventricular hyperintensity, lacuna infarcts and stroke [12,14–19,25–28]. In the present study, we also found that CKD patients with CMBs were significantly older than those without and that the blood pressure of patients with CMBs was significantly higher than those without, which was consistent with previous reports [17–19,25,28]. In this study, one of the most significant factors associated with the presence of CMBs in CKD patients was blood pressure. In both univariate logistic regression analysis and logistic regression analysis, after adjustment for age and gender, systolic pressure, diastolic pressure and pulse pressure were strong, significant factors for the presence of CMBs. This result showed that presence of hypertension is a common risk factor in both normal subjects and CKD patients.

In haemodialysis patients, there was a significantly higher prevalence of CMBs compared with normal subjects, as high as 19.3 to 35.0% [16,21]. In the present study of predialysis CKD patients, 35 out of 162 CKD patients exhibited CMBs (21.6%), while none of the healthy control subjects exhibited CMBs. We found that the prevalence of CMBs in predialysis patients was associated with BUN, serum creatinine and eGFR. There was a significantly higher prevalence of CMBs as the stage of CKD advanced. Considering both the previous study of haemodialysis patients and the present study, it is suggested that advanced renal failure could be associated with increased

prevalence of CMBs. Kobayashi *et al.* examined silent brain infarction in CKD patients and reported that CKD progression was associated significantly with the increased prevalence of silent brain infarction, one of the cerebrovascular diseases. In their report, age, prevalence of hypertension and systolic pressure were higher in patients with silent brain infarction, whereas eGFR was significantly lower in patients with silent brain infarction. Our study, which examined CMBs, was similar to their study of silent brain infarction, in that advanced CKD was associated with cerebrovascular disease. In multivariate logistic analysis of factors in the study of Kobayashi *et al.*, significant factors associated with silent brain infarction were lower eGFR, older age and higher systolic pressure [29]. Similarly, several reports have indicated that CKD is associated with a high prevalence of overt clinical stroke [8–11,30]. These reports and our results could indicate that decreased renal function is associated significantly with cerebrovascular disease and that poor kidney function indicates an increased risk for clinical and subclinical stroke.

In general, diabetes mellitus and dyslipidaemia are independent risk factors for cardiovascular disease [31]. Recently, however, several studies have reported that small cerebral vessel diseases, such as CMBs, are not associated with diabetes [4,16,17,19,28,29] or dyslipidaemia [4,17,19]. Consistent with these reports, there was no significant association between the prevalence of diabetes mellitus or dyslipidaemia and the prevalence of CMBs in the present study. Taken together with previous studies and ours, it is indicated that renal failure is an independent risk factor for the prevalence of subclinical cerebrovascular disease in patients both with and without diabetes and dyslipidaemia.

Anticoagulation or anti-platelet therapy in patients with small vessel cerebrovascular disease and a past history of ischaemic stroke have a higher risk of intracerebral haemorrhage [32]. It is particularly important to identify and remove such patients who are prone to bleeding complication after anticoagulation or anti-platelet therapy [13]. In the present study, however, there were no significant differences in the prevalence of CMBs between patients with and without anticoagulation and/or anti-platelet therapy. Since there is no consistent evidence for therapeutic efficacy, further studies are required to explore whether anticoagulation and/or anti-platelet therapy should be ceased in CKD patients with CMBs. In the present study, we could not measure the amount of proteinuria/albuminuria. Since increased excretion of urinary protein has been reported to be significantly associated with cardiovascular mortality

[33], further studies are required to explore whether amount of proteinuria/albuminuria could affect the presence of CMBs.

In conclusion, we demonstrated that decreased renal function and hypertension were significantly and independently associated with the presence of CMBs in predialysis CKD patients. Our findings suggest that CKD patients should be considered as a high risk population for cerebrovascular events. Treatment of hypertension in predialysis CKD patients is considered to be very important for the prevention of CMBs and probably for clinically overt strokes. CMBs in predialysis CKD patients, as assessed by T2\*-weighted MRI, would be a useful and feasible clinical marker for the prediction of future cerebrovascular events. This study also suggested that careful attention should be paid to cerebrovascular disease in predialysis CKD patients.

**Acknowledgements.** The authors have not received funding for research on this article.

**Conflict of interest statement.** None declared.

## References

- Brugts JJ, Knetsch AM, Mattace-Raso FU *et al.* Renal function and risk of myocardial infarction in an elderly population: the Rotterdam Study. *Arch Intern Med* 2005; 165: 2659–2665
- Shlipak MG, Sarnak MJ, Katz R *et al.* Cystatin C and the risk of death and cardiovascular events among elderly persons. *N Engl J Med* 2005; 352: 2049–2060
- Foley RN, Wang C, Collins AJ. Cardiovascular risk factor profiles and kidney function stage in the US general population: the NHANES III study. *Mayo Clin Proc* 2005; 80: 1270–1277
- Ikram MA, Vernooij MW, Hofman A *et al.* Kidney function is related to cerebral small vessel disease. *Stroke* 2008; 39: 55–61
- Descamps-Latscha B, Witko-Sarsat V, Nguyen-Khoa T *et al.* Advanced oxidation protein products as risk factors for atherosclerotic cardiovascular events in nondiabetic predialysis patients. *Am J Kidney Dis* 2005; 45: 39–47
- Shoji T, Nishizawa Y. Chronic kidney disease as a metabolic syndrome with malnutrition—need for strict control of risk factors. *Intern Med* 2005; 44: 179–187
- Ishimura E, Okuno S, Taniwaki H *et al.* Different risk factors for vascular calcification in end-stage renal disease between diabetics and nondiabetics: the respective importance of glycemic and phosphate control. *Kidney Blood Press Res* 2008; 31: 10–15
- Ninomiya T, Kiyohara Y, Kubo M *et al.* Chronic kidney disease and cardiovascular disease in a general Japanese population: the Hisayama Study. *Kidney Int* 2005; 68: 228–236
- Weiner DE, Tighiouart H, Amin MG *et al.* Chronic kidney disease as a risk factor for cardiovascular disease and all-cause mortality: a pooled analysis of community-based studies. *J Am Soc Nephrol* 2004; 15: 1307–1315
- Wang JG, Staessen JA, Fagard RH *et al.* Prognostic significance of serum creatinine and uric acid in older Chinese patients with isolated systolic hypertension. *Hypertension* 2001; 37: 1069–1074
- Nakayama M, Metoki H, Terawaki H *et al.* Kidney dysfunction as a risk factor for first symptomatic stroke events in a general Japanese population—the Ohasama study. *Nephrol Dial Transplant* 2007; 22: 1910–1915
- Fazekas F, Kleinert R, Roob G *et al.* Histopathologic analysis of foci of signal loss on gradient-echo T2\*-weighted MR images in patients with spontaneous intracerebral hemorrhage: evidence of microangiopathy-related microbleeds. *AJNR Am J Neuroradiol* 1999; 20: 637–642
- Kato H, Izumiyama M, Izumiyama K *et al.* Silent cerebral microbleeds on T2\*-weighted MRI: correlation with stroke subtype, stroke recurrence, and leukoaraiosis. *Stroke* 2002; 33: 1536–1540
- Kinoshita T, Okudera T, Tamura H *et al.* Assessment of lacunar hemorrhage associated with hypertensive stroke by echo-planar gradient-echo T2\*-weighted MRI. *Stroke* 2000; 31: 1646–1650
- Offenbacher H, Fazekas F, Schmidt R *et al.* MR of cerebral abnormalities concomitant with primary intracerebral hematomas. *AJNR Am J Neuroradiol* 1996; 17: 573–578
- Roob G, Schmidt R, Kapeller P *et al.* MRI evidence of past cerebral microbleeds in a healthy elderly population. *Neurology* 1999; 52: 991–994
- Tsushima Y, Tanizaki Y, Aoki J *et al.* MR detection of microhemorrhages in neurologically healthy adults. *Neuroradiology* 2002; 44: 31–36
- Viswanathan A, Chabriat H. Cerebral microhemorrhage. *Stroke* 2006; 37: 550–555
- Jeerakathil T, Wolf PA, Beiser A *et al.* Cerebral microbleeds: prevalence and associations with cardiovascular risk factors in the Framingham Study. *Stroke* 2004; 35: 1831–1835
- Yokoyama S, Hirano H, Uomizu K *et al.* High incidence of microbleeds in hemodialysis patients detected by T2\*-weighted gradient-echo magnetic resonance imaging. *Neurol Med Chir (Tokyo)* 2005; 45: 556–560
- Watanabe A. Cerebral microbleeds and intracerebral hemorrhages in patients on maintenance hemodialysis. *J Stroke Cerebrovasc Dis* 2007; 16: 30–33
- Levey AS, Eckardt KU, Tsukamoto Y *et al.* Definition and classification of chronic kidney disease: a position statement from Kidney Disease: Improving Global Outcomes (KDIGO). *Kidney Int* 2005; 67: 2089–2100
- Report of the Expert Committee on the Diagnosis and Classification of Diabetes Mellitus. *Diabetes Care* 1997; 20: 1183–1197
- Imai E, Horio M, Nitta K *et al.* Modification of the Modification of Diet in Renal Disease (MDRD) Study equation for Japan. *Am J Kidney Dis* 2007; 50: 927–937
- Viswanathan A, Rakich SM, Engel C *et al.* Antiplatelet use after intracerebral hemorrhage. *Neurology* 2006; 66: 206–209
- Tanaka A, Ueno Y, Nakayama Y *et al.* Small chronic hemorrhages and ischemic lesions in association with spontaneous intracerebral hematomas. *Stroke* 1999; 30: 1637–1642
- Greenberg SM, Vernooij MW, Cordonnier C *et al.* Cerebral microbleeds: a guide to detection and interpretation. *Lancet Neurol* 2009; 8: 165–174
- Roob G, Lechner A, Schmidt R *et al.* Frequency and location of microbleeds in patients with primary intracerebral hemorrhage. *Stroke* 2000; 31: 2665–2669
- Kobayashi M, Hirawa N, Yatsu K *et al.* Relationship between silent brain infarction and chronic kidney disease. *Nephrol Dial Transplant* 2009; 24: 201–207
- Weiner DE, Tabatabai S, Tighiouart H *et al.* Cardiovascular outcomes and all-cause mortality: exploring the interaction between CKD and cardiovascular disease. *Am J Kidney Dis* 2006; 48: 392–401
- Movahed MR, Hashemzadeh M, Jamal MM. Diabetes mellitus is a strong, independent risk for atrial fibrillation and flutter in addition to other cardiovascular disease. *Int J Cardiol* 2005; 105: 315–318
- Gorter JW. Major bleeding during anticoagulation after cerebral ischemia: patterns and risk factors. Stroke Prevention In Reversible Ischemia Trial (SPIRIT). European Atrial Fibrillation Trial (EAFT) study groups. *Neurology* 1999; 53: 1319–1327
- Muntner P, He J, Hamm L *et al.* Renal insufficiency and subsequent death resulting from cardiovascular disease in the United States. *J Am Soc Nephrol* 2002; 13: 745–753

Received for publication: 3.9.09; Accepted in revised form: 23.11.09
